# Supplementary material for: Recent Progress in a Membrane-Based Technique for Propylene/Propane Separation
Source: MDPI journal article supplement (doi:10.3390/membranes11050310), 2021-04-23
Supplement: s1 [file s1]

## Supporting Information

Table S1 The detailed separation performance of various kinds of membranes

| Membrane                              | C <sub>3</sub> H <sub>6</sub> permeance<br>[mol m <sup>-2</sup> s <sup>-1</sup> Pa <sup>-1</sup> ] | C <sub>3</sub> H <sub>6</sub> /C <sub>3</sub> H <sub>8</sub><br>selectivity [-] | Ref. |
|---------------------------------------|----------------------------------------------------------------------------------------------------|---------------------------------------------------------------------------------|------|
|                                       | 2.01~3.35×10 <sup>-12</sup>                                                                        | 10~16*                                                                          | 1    |
| Polymer                               | 6.7×10 <sup>-12</sup> ~4.4×10 <sup>-9</sup>                                                        | 1.7~13                                                                          | 2    |
| Facilitated<br>transport<br>membranes | 1.7~3.5×10 <sup>-9</sup>                                                                           | 9.4 ~ 15                                                                        | 3    |
|                                       | 4.5~7.1×10 <sup>-9</sup>                                                                           | 5 ~ 15                                                                          | 4    |
|                                       | 3×10 <sup>-9</sup>                                                                                 | 36                                                                              | 5    |
| CMS                                   | 1×10 <sup>-8</sup>                                                                                 | 31                                                                              | 6    |
|                                       | 1.67×10 <sup>-8</sup>                                                                              | 13                                                                              | 7    |
|                                       | 1.12×10 <sup>-9</sup>                                                                              | 100                                                                             | 8    |
|                                       | 3×10 <sup>-8</sup>                                                                                 | 50                                                                              | 9    |
|                                       | 1.1×10 <sup>-8</sup>                                                                               | 30                                                                              | 10   |
|                                       | 2×10 <sup>-8</sup>                                                                                 | 55                                                                              | 11   |
|                                       | 8.5×10 <sup>-8</sup>                                                                               | 36                                                                              | 12   |
|                                       | 6.1×10 <sup>-8</sup>                                                                               | 142                                                                             | 13   |
| ZIF                                   | 6.2×10 <sup>-9</sup>                                                                               | 61                                                                              | 14   |
|                                       | 2.4×10 <sup>-8</sup>                                                                               | 93                                                                              | 15   |
|                                       | 1.3×10 <sup>-8</sup>                                                                               | 67                                                                              | 16   |
|                                       | 1.54×10 <sup>-8</sup>                                                                              | 300                                                                             | 17   |
|                                       | 3.7×10 <sup>-8</sup>                                                                               | 200                                                                             | 18   |
|                                       | 1.75×10 <sup>-8</sup>                                                                              | 200                                                                             | 19   |
|                                       | 6.32×10 <sup>-7</sup>                                                                              | 8.8                                                                             | 20   |
|                                       | 4.95×10 <sup>-8</sup>                                                                              | 30                                                                              | 21   |
|                                       | 7×10 <sup>-9</sup>                                                                                 | 30                                                                              | 22   |
| Organosilica                          | 1×10 <sup>-7</sup>                                                                                 | 33                                                                              | 23   |
|                                       | 1×10 <sup>-7</sup>                                                                                 | 12                                                                              | 24   |
|                                       | 4.5×10 <sup>-8</sup>                                                                               | 33                                                                              | 25   |
|                                       | 1.7×10 <sup>-8</sup>                                                                               | 52                                                                              | 26   |
|                                       | 2.2×10 <sup>-7</sup>                                                                               | 42                                                                              | 27   |
| MMMs                                  | 1.05~1.68×10 <sup>-10</sup>                                                                        | 15~20                                                                           | 28   |
|                                       | 1.34~1.68×10 <sup>-10</sup>                                                                        | 12.5~15                                                                         | 29   |

## References

- [1] C. Staudt-Bickel, W.J. Koros, Olefin/paraffin gas separations with 6FDA-based polyimide membranes, *J. Membr. Sci.* 170 (2000) 205-214.
- [2] K. Tanaka, A. Taguchi, J. Hao, H. Kita, K. Okamoto, Permeation and separation properties of polyimide membranes to olefins and paraffins, *J. Membr. Sci.* 121 (1996) 197-207.
- [3] K.-S. Liao, J.-Y. Lai, T.-S. Chung, Metal ion modified PIM-1 and its application for propylene/propane separation, *J. Membr. Sci.* 515 (2016) 36-44.
- [4] S. Kasahara, E. Kamio, R. Minami, H. Matsuyama, A facilitated transport ion-gel membrane for propylene/propane separation using silver ion as a carrier, *J. Membr. Sci.* 431 (2013) 121-130.
- [5] X. Ma, B.K. Lin, X. Wei, J. Kniep, Y. Lin, Gamma-alumina supported carbon molecular sieve membrane for propylene/propane separation, *Ind. Eng. Chem. Res.* 52 (2013) 4297-4305.
- [6] X. Ma, Y. Lin, X. Wei, J. Kniep, Ultrathin carbon molecular sieve membrane for propylene/propane separation, *AIChE J.* 62 (2016) 491-499.
- [7] Okamoto, K.-i.; Kawamura, S.; Yoshino, M.; Kita, H.; Hirayama, Y.; Tanihara, N.; Kusuki, Y., Olefin/paraffin separation through carbonized membranes derived from an asymmetric polyimide hollow fiber membrane. *Ind. Eng. Chem. Res.* **1999**, 38, (11), 4424-4432.
- [8] Steel, K. M.; Koros, W. J., An investigation of the effects of pyrolysis parameters on gas separation properties of carbon materials. *Carbon* 2005, 43, (9), 1843-1856.
- [9] Pan, Y.; Li, T.; Lestari, G.; Lai, Z., Effective separation of propylene/propane binary mixtures by ZIF-8 membranes. *J. Membr. Sci.* 2012, 390, 93-98.
- [10] Liu, D.; Ma, X.; Xi, H.; Lin, Y., Gas transport properties and propylene/propane separation characteristics of ZIF-8 membranes. *J. Membr. Sci.* 2014, 451, 85-93.
- [11] Kwon, H. T.; Jeong, H.-K., In situ synthesis of thin zeolitic-imidazolate framework ZIF-8 membranes exhibiting exceptionally high propylene/propane separation. *J. Am. Chem. Soc.* 2013, 135, (29), 10763-10768.

- [12] Tanaka, S.; Okubo, K.; Kida, K.; Sugita, M.; Takewaki, T., Grain size control of ZIF-8 membranes by seeding-free aqueous synthesis and their performances in propylene/propane separation. *J. Membr. Sci.* 2017, 544, 306-311.
- [13] Wei, R.; Chi, H. Y.; Li, X.; Lu, D.; Wan, Y.; Yang, C. W.; Lai, Z., Aqueously Cathodic Deposition of ZIF - 8 Membranes for Superior Propylene/Propane Separation. *Adv. Funct. Mater.* 2019, 1907089.
- [14] Yu, J.; Pan, Y.; Wang, C.; Lai, Z., ZIF-8 membranes with improved reproducibility fabricated from sputter-coated ZnO/alumina supports. *Chem. Eng. Sci.* 2016, 141, 119-124.
- [15] Sheng, L.; Wang, C.; Yang, F.; Xiang, L.; Huang, X.; Yu, J.; Zhang, L.; Pan, Y.; Li, Y., Enhanced C<sub>3</sub>H<sub>6</sub>/C<sub>3</sub>H<sub>8</sub> separation performance on MOF membranes through blocking defects and hindering framework flexibility by silicone rubber coating. *Chem. Commun.* 2017, 53, (55), 7760-7763.
- [16] Li, J.; Lian, H.; Wei, K.; Song, E.; Pan, Y.; Xing, W., Synthesis of tubular ZIF-8 membranes for propylene/propane separation under high-pressure. *J. Membr. Sci.* **2020**, 595, 117503.
- [17] Zhou, S.; Wei, Y.; Li, L.; Duan, Y.; Hou, Q.; Zhang, L.; Ding, L.-X.; Xue, J.; Wang, H.; Caro, J., Paralyzed membrane: Current-driven synthesis of a metal-organic framework with sharpened propene/propane separation. *Sci. Adv.* 2018, 4, (10), eaau1393.
- [18] Kwon, H. T.; Jeong, H.-K.; Lee, A. S.; An, H. S.; Lee, J. S., Heteroepitaxially grown zeolitic imidazolate framework membranes with unprecedented propylene/propane separation performances. *J. Am. Chem. Soc.* 2015, 137, (38), 12304-12311.
- [19] Hou, Q.; Zhou, S.; Wei, Y.; Caro, J.; Wang, H., Balancing the grain boundary structure and the framework flexibility through bimetallic MOF membranes for gas separation. *J. Am. Chem. Soc.* 2020, 142, (21), 9582–9586.
- [20] Kanezashi, M.; Kawano, M.; Yoshioka, T.; Tsuru, T., Organic–inorganic hybrid silica membranes with controlled silica network size for propylene/propane separation. *Ind. Eng. Chem. Res.* 2011, 51, (2), 944-953.
- [21] Kanezashi, M.; Shazwani, W.; Yoshioka, T.; Tsuru, T., Separation of propylene/propane binary mixtures by bis (triethoxysilyl) methane (BTESM)-derived

silica membranes fabricated at different calcination temperatures. *J. Membr. Sci.* 2012, 415, 478-485.

[22] Kanezashi, M.; Miyauchi, S.; Nagasawa, H.; Yoshioka, T.; Tsuru, T., Gas permeation properties through Al-doped organosilica membranes with controlled network size. *J. Membr. Sci.* 2014, 466, 246-252.

[23] Kanezashi, M.; Miyauchi, S.; Hayakawa, S.; Nagasawa, H.; Yoshioka, T.; Tsuru, T., Propylene/propane permeation properties of metal-doped organosilica membranes with controlled network sizes and adsorptive properties. *J. Jpn. Pet. Inst.* 2016, 59, 140-148.

[24] Guo, M.; Kanezashi, M.; Nagasawa, H.; Yu, L.; Yamamoto, K.; Gunji, T.; Ohshita, J.; Tsuru, T., Tailoring the microstructure and permeation properties of bridged organosilica membranes via control of the bond angles. *J. Membr. Sci.* 2019, 584, 56-65.

[25] Guo, M.; Kanezashi, M.; Nagasawa, H.; Yu, L.; Yamamoto, K.; Gunji, T.; Tsuru, T., Fine - tuned, molecular - composite, organosilica membranes for highly efficient propylene/propane separation via suitable pore size. *AIChE J.* 2020, 66, (4), e16850.

[26] Guo, M.; Kanezashi, M.; Nagasawa, H.; Yu, L.; Yamamoto, K.; Gunji, T.; Ohshita, J.; Tsuru, T., Pore sub-nano-environment engineering of organosilica membranes for highly selective propylene/propane separation. *J. Membr. Sci.* 2020, 117999.

[27] Kanezashi, M.; Matsutani, T.; Nagasawa, H.; Tsuru, T., Fluorine-induced microporous silica membranes: Dramatic improvement in hydrothermal stability and pore size controllability for highly permeable propylene/propane separation. *J. Membr. Sci.* 2018, 549, 111-119.

[28] Liu, Y.; Chen, Z.; Liu, G.; Belmabkhout, Y.; Adil, K.; Eddaoudi, M.; Koros, W., Conformation-controlled molecular sieving effects for membrane-based propylene/propane separation. *Adv. Mater.* 2019, 31, (14), 1807513.

[29] Yu, J.; Wang, C.; Xiang, L.; Xu, Y.; Pan, Y., Enhanced C<sub>3</sub>H<sub>6</sub>/C<sub>3</sub>H<sub>8</sub> separation performance in poly (vinyl acetate) membrane blended with ZIF-8 nanocrystals. *Chem. Eng. Sci.* 2018, 179, 1-12.
